# Supplementary material for: Rates of respiratory syncytial virus (RSV)-associated hospitalization among adults with congestive heart failure—United States, 2015–2017
Source: PubMed Central journal article supplement (PMC8906631; doi:10.1371/journal.pone.0264890), 2022-03-09
Supplement: pone.0264890.s001.pdf [file pone.0264890.s001.pdf]

**S1 Table. Adults testing positive for RSV by CHF status and by age group, RSV-NET, 2015–2017 (N = 2042)**

|                                                              | <65 years (n=812) |       |                |       | p-value <sup>a</sup> | ≥65 years (n=1230) |       |                |       | p-value <sup>a</sup> |
|--------------------------------------------------------------|-------------------|-------|----------------|-------|----------------------|--------------------|-------|----------------|-------|----------------------|
|                                                              | CHF (n=153)       |       | No CHF (n=659) |       |                      | CHF (n=424)        |       | No CHF (n=806) |       |                      |
|                                                              | No.               | %     | No.            | %     |                      | No.                | %     | No.            | %     |                      |
| <b>Demographics</b>                                          |                   |       |                |       |                      |                    |       |                |       |                      |
| Sex                                                          |                   |       |                |       |                      |                    |       |                |       |                      |
| Male                                                         | 67                | 43.8  | 265            | 40.2  | 0.42                 | 178                | 42.0  | 324            | 40.2  | 0.55                 |
| Female                                                       | 86                | 56.2  | 394            | 59.8  |                      | 246                | 58.0  | 482            | 59.8  |                      |
| COPD                                                         | 58                | 37.9  | 171            | 26.0  | 0.003                | 172                | 40.6  | 255            | 31.6  | 0.002                |
| Asthma                                                       | 52                | 34.0  | 193            | 29.3  | 0.25                 | 90                 | 21.2  | 189            | 23.4  | 0.38                 |
| Immunocompromising condition <sup>b</sup>                    | 36                | 23.5  | 237            | 36.0  | 0.003                | 63                 | 14.9  | 145            | 18.0  | 0.16                 |
| Number of underlying conditions, median (range) <sup>c</sup> | 3                 | (2–3) | 1              | (1–2) | <0.001               | 3                  | (2–4) | 2              | (1–3) | <0.001               |
| Race                                                         |                   |       |                |       |                      |                    |       |                |       |                      |
| White                                                        | 68                | 44.4  | 341            | 51.8  | 0.22                 | 302                | 71.2  | 587            | 72.8  | 0.01                 |
| Black or African American                                    | 66                | 43.1  | 218            | 33.1  |                      | 69                 | 16.3  | 81             | 10.0  |                      |
| Asian/Pacific Islander                                       | 6                 | 3.9   | 31             | 4.7   |                      | 31                 | 7.3   | 85             | 10.5  |                      |
| American Indian or Alaska Native                             | 1                 | 0.7   | 4              | 0.6   |                      | 0                  | 0.0   | 2              | 0.2   |                      |
| Multiracial                                                  | 0                 | 0.0   | 8              | 1.2   |                      | 0                  | 0.0   | 2              | 0.2   |                      |
| Not specified                                                | 12                | 7.8   | 57             | 8.7   |                      | 22                 | 5.2   | 49             | 6.1   |                      |
| Body mass index                                              |                   |       |                |       |                      |                    |       |                |       |                      |
| Underweight (<18.5)                                          | 6                 | 3.9   | 30             | 4.6   | <0.001               | 14                 | 3.3   | 37             | 4.6   | 0.22                 |
| Normal (18.5–24.9)                                           | 23                | 15.0  | 166            | 25.2  |                      | 95                 | 22.4  | 208            | 25.8  |                      |
| Overweight (25–29.9)                                         | 31                | 20.3  | 161            | 24.4  |                      | 130                | 30.7  | 245            | 30.4  |                      |
| Obese (30–39.9)                                              | 47                | 30.7  | 177            | 26.9  |                      | 117                | 25.6  | 201            | 24.9  |                      |
| Morbidly obese (≥40)                                         | 39                | 25.5  | 81             | 12.3  |                      | 37                 | 8.7   | 47             | 5.8   |                      |
| Missing                                                      | 7                 | 4.6   | 44             | 6.7   |                      | 31                 | 7.3   | 68             | 8.4   |                      |
| Insurance                                                    |                   |       |                |       |                      |                    |       |                |       |                      |
| Private only                                                 | 26                | 17.0  | 211            | 32.0  | <0.001               | 18                 | 4.3   | 42             | 5.2   | 0.12                 |
| Medicare only                                                | 16                | 10.5  | 58             | 8.8   |                      | 113                | 26.7  | 246            | 30.5  |                      |
| Medicaid only                                                | 26                | 17.0  | 111            | 16.8  |                      | 6                  | 1.4   | 11             | 1.4   |                      |
| Other only                                                   | 1                 | 0.7   | 6              | 0.9   |                      | 5                  | 1.2   | 7              | 0.9   |                      |
| >1 insurance                                                 | 60                | 39.2  | 148            | 22.5  |                      | 239                | 56.4  | 386            | 47.9  |                      |
| No insurance                                                 | 3                 | 2.0   | 18             | 2.7   |                      | 2                  | 0.5   | 3              | 0.4   |                      |

|                                                                                                                                                                                                                                                                                                                                                                                                                                                                                                                                                                                                                                                                                                                                                                                               | <65 years (n=812) |        |                |       | p-value | ≥65 years (n=1230) |       |                |         | p-value |
|-----------------------------------------------------------------------------------------------------------------------------------------------------------------------------------------------------------------------------------------------------------------------------------------------------------------------------------------------------------------------------------------------------------------------------------------------------------------------------------------------------------------------------------------------------------------------------------------------------------------------------------------------------------------------------------------------------------------------------------------------------------------------------------------------|-------------------|--------|----------------|-------|---------|--------------------|-------|----------------|---------|---------|
|                                                                                                                                                                                                                                                                                                                                                                                                                                                                                                                                                                                                                                                                                                                                                                                               | CHF (n=153)       |        | No CHF (n=659) |       |         | CHF (n=424)        |       | No CHF (n=806) |         |         |
|                                                                                                                                                                                                                                                                                                                                                                                                                                                                                                                                                                                                                                                                                                                                                                                               | No.               | %      | No.            | %     |         | No.                | %     | No.            | %       |         |
| Unknown                                                                                                                                                                                                                                                                                                                                                                                                                                                                                                                                                                                                                                                                                                                                                                                       | 21                | 13.7   | 107            | 16.2  |         | 41                 | 9.7   | 111            | 13.8    |         |
| <b>Smoking status</b>                                                                                                                                                                                                                                                                                                                                                                                                                                                                                                                                                                                                                                                                                                                                                                         |                   |        |                |       |         |                    |       |                |         |         |
| Current                                                                                                                                                                                                                                                                                                                                                                                                                                                                                                                                                                                                                                                                                                                                                                                       | 44                | 28.8   | 219            | 33.2  | 0.20    | 36                 | 8.5   | 69             | 8.6     | 0.45    |
| Former                                                                                                                                                                                                                                                                                                                                                                                                                                                                                                                                                                                                                                                                                                                                                                                        | 45                | 29.4   | 150            | 22.8  |         | 180                | 42.5  | 313            | 38.8    |         |
| No/unknown                                                                                                                                                                                                                                                                                                                                                                                                                                                                                                                                                                                                                                                                                                                                                                                    | 65                | 41.8   | 290            | 44.0  |         | 208                | 49.1  | 424            | 52.6    |         |
| <b>Clinical course</b>                                                                                                                                                                                                                                                                                                                                                                                                                                                                                                                                                                                                                                                                                                                                                                        |                   |        |                |       |         |                    |       |                |         |         |
| Viral co-detection                                                                                                                                                                                                                                                                                                                                                                                                                                                                                                                                                                                                                                                                                                                                                                            | 10                | 7.1    | 48             | 7.9   | 0.77    | 30                 | 7.4   | 42             | 5.5     | 0.19    |
| Bacterial co-detection                                                                                                                                                                                                                                                                                                                                                                                                                                                                                                                                                                                                                                                                                                                                                                        | 13                | 8.5    | 54             | 8.2   | 0.90    | 34                 | 8.0   | 44             | 5.5     | 0.08    |
| Length of hospital stay, median (IQR)                                                                                                                                                                                                                                                                                                                                                                                                                                                                                                                                                                                                                                                                                                                                                         | 6                 | (3–10) | 4              | (2–7) | <0.001  | 5                  | (3–8) | 4              | (2–6)   | 0.003   |
| ICU admission                                                                                                                                                                                                                                                                                                                                                                                                                                                                                                                                                                                                                                                                                                                                                                                 | 51                | 33.3   | 144            | 21.9  | 0.003   | 90                 | 21.3  | 129            | 16.0    | 0.02    |
| Mechanical ventilation                                                                                                                                                                                                                                                                                                                                                                                                                                                                                                                                                                                                                                                                                                                                                                        | 22                | 43.1   | 60             | 41.7  | 0.91    | 37                 | 41.1  | 52             | 40.3    | 0.83    |
| Length of ICU stay, median (IQR)                                                                                                                                                                                                                                                                                                                                                                                                                                                                                                                                                                                                                                                                                                                                                              | 5                 | (2–14) | 3              | (1–7) | 0.007   | 3                  | (1–6) | 3              | (1.5–6) | 0.76    |
| Died                                                                                                                                                                                                                                                                                                                                                                                                                                                                                                                                                                                                                                                                                                                                                                                          | 5                 | 3.2    | 18             | 2.7   | 0.72    | 40                 | 9.4   | 48             | 4.7     | 0.001   |
| Abbreviations: CHF = congestive heart failure; ICU = intensive care unit; IQR = interquartile range; RSV respiratory syncytial virus.<br><sup>a</sup> chi-square test or Wilcoxon rank sum test, where appropriate<br><sup>b</sup> Immunocompromising conditions included AIDS or CD4 count <200 cells/mm <sup>3</sup> , being in treatment for cancer or cancer diagnosed in the last 12 months, complement deficiency, HIV infection, immunoglobulin deficiency, immunosuppressive therapy, bone marrow transplant, organ transplant, steroid therapy, or other immunosuppressive condition.<br><sup>c</sup> Underlying conditions included chronic lung disease, chronic metabolic disease, blood disorders, cardiovascular disease, neurologic disease, renal disease, and liver disease. |                   |        |                |       |         |                    |       |                |         |         |
