# Supplementary material for: Rates of respiratory syncytial virus (RSV)-associated hospitalization among adults with congestive heart failure—United States, 2015–2017
Source: PubMed Central journal article supplement (PMC8906631; doi:10.1371/journal.pone.0264890), 2022-03-09
Supplement: pone.0264890.s002.pdf [file pone.0264890.s002.pdf]

**S2 Table. Estimated multipliers for under-detection of RSV in RSV-NET, 2015–2017**

|                | Multiplier | 95% CI   |
|----------------|------------|----------|
| Overall        |            |          |
| All ages       | 5.7        | 3.6-13.7 |
| <65 years      | 5.3        | 3.4-12.0 |
| ≥65 years      | 5.5        | 3.5-13.2 |
| <b>2015-16</b> |            |          |
| All ages       | 6.8        | 4.0-23.4 |
| <65 years      | 5.9        | 3.5-19.6 |
| ≥65 years      | 6.3        | 3.7-19.8 |
| <b>2016-17</b> |            |          |
| All ages       | 5.3        | 3.4-12.4 |
| <65 years      | 4.9        | 3.2-10.5 |
| ≥65 years      | 4.5        | 3.0-9.1  |

Note: All ages multiplier is larger than age stratified multipliers due to beta binomial distribution adjustment.
