# Supplementary material for: Rates of respiratory syncytial virus (RSV)-associated hospitalization among adults with congestive heart failure—United States, 2015–2017
Source: PubMed Central journal article supplement (PMC8906631; doi:10.1371/journal.pone.0264890), 2022-03-09
Supplement: pone.0264890.s003.pdf [file pone.0264890.s003.pdf]

**S3 Table. Rates (per 10,000 population) of RSV-associated hospitalization by congestive heart failure (CHF) status and by surveillance year, RSV-NET, 2015–2017 (N = 2042)**

|                     | Crude        |           |                 |          | Adjusted for under-detection <sup>a</sup> and age |            |                 |            | Adjusted for under-detection <sup>a</sup> and age |            |            |            |
|---------------------|--------------|-----------|-----------------|----------|---------------------------------------------------|------------|-----------------|------------|---------------------------------------------------|------------|------------|------------|
|                     | CHF (95% CI) |           | no CHF (95% CI) |          | CHF (95% CI)                                      |            | no CHF (95% CI) |            | Rate difference                                   | 95% CI     | Rate ratio | 95% CI     |
| <b>2015–2016</b>    |              |           |                 |          |                                                   |            |                 |            |                                                   |            |            |            |
| <b>All ages</b>     | 5.1          | 4.3, 6.0  | 0.5             | 0.5, 0.5 | 24.5                                              | 20.4, 29.2 | 3.2             | 3.2, 3.2   | 21.3                                              | 17.2, 26.0 | 7.7        | 6.4, 9.2   |
| <b>&lt;65 years</b> | 3.7          | 3.1, 4.5  | 0.3             | 0.3, 0.3 | 22.1                                              | 18.1, 26.8 | 1.7             | 1.7, 1.7   | 20.3                                              | 16.4, 25.0 | 12.7       | 10.4, 15.3 |
| <b>≥65 years</b>    | 5.9          | 5.1, 6.8  | 1.7             | 1.7, 1.7 | 36.8                                              | 31.9, 42.3 | 10.6            | 10.4, 10.8 | 26.2                                              | 21.6, 31.5 | 3.5        | 3.1, 3.9   |
| <b>2016–2017</b>    |              |           |                 |          |                                                   |            |                 |            |                                                   |            |            |            |
| <b>All ages</b>     | 7.5          | 6.4, 8.8  | 0.7             | 0.7, 0.7 | 28.4                                              | 23.7, 33.9 | 3.4             | 3.4, 3.4   | 25.0                                              | 20.3, 30.6 | 8.4        | 7.0, 10.0  |
| <b>&lt;65 years</b> | 5.3          | 4.4, 6.5  | 0.3             | 0.3, 0.3 | 25.9                                              | 21.2, 31.4 | 1.6             | 1.6, 1.6   | 24.3                                              | 19.6, 29.8 | 15.8       | 13.0, 19.1 |
| <b>≥65 years</b>    | 8.8          | 7.7, 10.2 | 2.5             | 2.4, 2.5 | 39.5                                              | 34.2, 45.4 | 11.0            | 10.8, 11.2 | 28.5                                              | 23.5, 34.2 | 3.6        | 3.2, 4.0   |

<sup>a</sup> Adjusted for the under-detection of RSV (based on clinician testing practices and sensitivities of the laboratory tests).
